# Supplementary material
Source: publisher site journal article supplement (https://www.dovepress.com/get_supplementary_file.php?f=220741.docx)
Supplement: Supplementary file 1 [file get_supplementary_file.php]

**Supplementary Material**

**Appendix I: How to Identify Commercial Products with DNA Repair Enzymes**

DNA repair enzymes used in cosmetics and consumer products are most often listed on the label by either their tradename or their common industry-assigned name, as follows:

Photolyase: Photosomes® / plankton extract
UV Endonuclease: Ultrasomes® / micrococcus lysate
OGG1: Roxisomes® / arabadopsis thalania extract

T4 endonuclease V in liposomes is not currently available commercially.

The following websites were accessed on May 30, 2019 using these search terms to identify some commercial products either currently available or available in the past with these names for DNA repair enzymes:

http://www.skincaredupes.com/cosmetic-ingredient/micrococcus-lysate/

https://incidecoder.com/ingredients/micrococcus-lysate

http://www.skincaredupes.com/?s=plankton

https://www.truthinaging.com/review/arabidopsis-thaliana

https://thegoodfaceproject.com/ingredients/arabidopsis_thaliana_extract

A label listing the common name does not guarantee that the DNA repair enzyme is actually included (since other materials may also use the common name) and the listing does not provide information about the amount of the enzyme in the formula. Not all products containing DNA repair enzymes are necessarily on this list. Each product listed here should be more closely examined to determine if it includes DNA repair enzymes.

**Consumer Products that May Contain DNA Repair Enzymes:**

Artistry Time Defiance Intensive Repair Serum

Authentic Skin Care Recapture Day + IR Defense Anti-Aging Day Cream SPF 30

Babor ReVersive Anti-Aging Dual Serum

Bioclarity Restore Gel

Bobbi Brown Extra Eye Repair Cream

Bobbi Brown Hydrating Intense Night Cream

Bobbi Brown Overnight Cream

Cellular MD Night Shield

Cellular MD Daily Shield SPF+

Cellular MD Universal Protection Drops

Cellular MD Intensive Eye Balm

Cellular MD Reparative Hybrid Mask

Clinique Acne Solutions™ Acne + Line Correcting Serum

Clinique Continuous Rescue Antioxidant Moisturizer Combination Oily to Oily

Clinique For Men Super Energizer™ Spf 40 Anti-Fatigue Hydrating Concentrate

Clinique Id™: Active Cartridge Concentrate For Lines & Wrinkles

Clinique Moisture On-Call

Clinique Repairwear Laser Focus

Clinique Repairwear Laser Focus Wrinkle Correcting Eye Cream

Clinique Smart Custom Repair Eye Treatment

Clinique Smart Custom-Repair Serum

Clinique Smart Night Custom-Repair Moisturizer - Very Dry To Dry Skin

Clinique Sun SPF 50 Sunscreen Face Cream

Clinique Super Rescue Antioxidant Night Moisturizer - Very Dry to Dry Skin

Clinique Super Rescue Antioxidant Night Moisturizer - Combo-Oily

Clinique Superdefense Daily Defense Moisturizer SPF 20

Clinique Superdefense SPF 20 Age Defense Eye Cream

Clinique Turnaround Overnight Radiance Moisturizer

Clinique Turnaround™ Overnight Revitalizing Moisturizer

Colleen Rothschild Vitamin C Treatment Complex

Darphin Ideal Resource Light Re-Birth Overnight Cream

DNA Renewal DNA Eye Balm

DNA Renewal DNA Intensive Renewal

Dr. Macrene High Performance Anti-Aging Cream

Dr. Macrene 37 Actives Extra Rich High Performance Anti-Aging Cream

Elizabeth Arden Prevage City Smart SPF 50 Hydrating Shield

Estee Lauder Re-Nutriv Intensive Age-Renewal Eye Cream

Estee Lauder Re-Nutriv Intensive Lifting Cream

Estee Lauder Re-Nutriv Re-Creation Eye Balm

Estee Lauder Re-Nutriv Re-Creation Night Creme

GM Collin Diamond Serum

Heliocare Advanced SPF 50 Gel

Heliocare Gel Ultra SPF 90

Image Prevention + Daily Ultimate Protection SPF 50

ISDIN Eryfotona Actinica Ultralight Emulsion Broad Spectrum SPF 50+

Jan Marini Age Intervention Face Cream Step 4

Kardashian Perfect Skin Repair and Protect

La Mer The Lifting And Firming Mask

La Mer The Moisturizing Soft Cream

La Mer The Moisturizing Soft Lotion

La Mer The Perfecting Treatment

Lifeline Skin Care Daily Defense Complex

LightStim PhotoSerum

Neogen Dermology Green Tea Real Fresh Foam Cleanser

Neova DNA Damage Control SPF 43 Water-Resistant

Neova DNA Total Repair Serum

Neova SmartScience DNA Damage Control Everyday SPF 44 For The Face

Origins Brighter By Nature SPF 35 Skin Tone Correcting Moisturizer

Origins Make A Difference Plus + Rejuvenating Treatment

Origins Make A Difference Plus + Ultra-Rich Rejuvenating Cream

Origins Mega-Mushroom Skin Relief Face Cream

Origins Mega-Mushroom Skin Relief Face Lotion

Origins Plantscription Anti-Aging Eye Treatment

Origins Plantscription Anti-Aging Power Serum

Origins Plantscription Powerful Lifting Concentrate

Origins Plantscription™ Youth-Renewing Power Night Cream

Perricone MD Blue Plasma Orbital

Perricone MD No Foundation Foundation

Philosophy Time In A Bottle 100% In Control

Philosophy Time In A Bottle Age-Defying Serum for Eyes

Philosophy Time In A Bottle Daily Age-Defying Serum

ReLuma Eye Cream

Serious Skincare Ultra-Mare Pure Marine Infusion Concentrated Treatment Pads

SilDerm Celfix DNA Youth Recovery Facial Serum

Topix SRS Bio-Repair Therapy

Tula Multi-Spectrum Eye Renewal Serum

Youth to the People Age Prevention Superfood Mask

Zelens Daily Defence Broad Spectrum Sunscreen SPF 30

Zo skin health Ossential® Daily Power Defense
